# Supplementary material
Source: PubMed Central journal article supplement (PMC2785977)

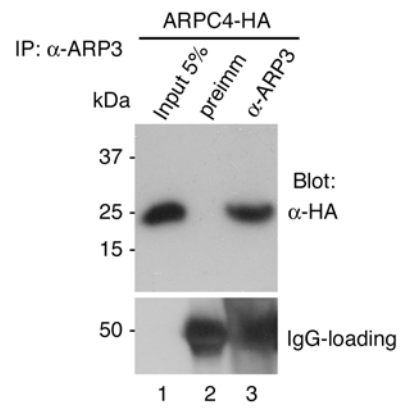

Supplement: pp.109.143859v2_1.pdf [file pp.109.143859v2_1.pdf]
